# Supplementary material
Source: PubMed Central journal article supplement (PMC8045669)
Supplement: NIHMS1687630-supplement-SI.pdf [file NIHMS1687630-supplement-SI.pdf]

## Supporting Information

### **Gadolinium Doping Enhances the Photoacoustic Signal of Synthetic Melanin Nanoparticles: A Dual Modality Contrast Agent for Stem Cell Imaging.**

*Jeanne E. Lemaster<sup>1‡</sup>, Zhao Wang<sup>2,4‡</sup>, Ali Hariri<sup>1</sup>, Fang Chen<sup>1,3</sup>, Ziyang Hu<sup>2,4</sup>, Yuran Huang<sup>2,4</sup>, Christopher V. Barback<sup>5</sup>, Richard Cochran<sup>2&</sup>, Nathan C. Gianneschi<sup>2,4,6,7\*</sup>, and Jesse V. Jokerst<sup>1,3,5\*</sup>*

\*Corresponding Authors

& Currently affiliated with Thermo Fisher Scientific, Analytical Instrumentation Group

E-mail: nathan.gianneschi@northwestern.edu, jjokerst@ucsd.edu

1. Department of NanoEngineering, University of California San Diego, 9500 Gilman Drive, La Jolla, CA, 92093, USA
2. Department of Chemistry and Biochemistry, University of California San Diego, 9500 Gilman Drive, La Jolla, CA, 92093, USA
3. Materials Science and Engineering Program, University of California, San Diego, 9500 Gilman Dr., La Jolla, CA 92093, USA.
4. Department of Chemistry, Northwestern University, 2145 Sheridan Road, Evanston, Illinois 60208, United States
5. Department of Radiology, University of California, San Diego, 9500 Gilman Dr., La Jolla, CA 92093, USA.
6. Department of Materials Science & Engineering, Northwestern University, 2145 Sheridan Road, Evanston, Illinois 60208, United States
7. Department of Biomedical Engineering, Northwestern University, 2145 Sheridan Road, Evanston, Illinois 60208, United States

*‡These authors contributed equally to this work.*

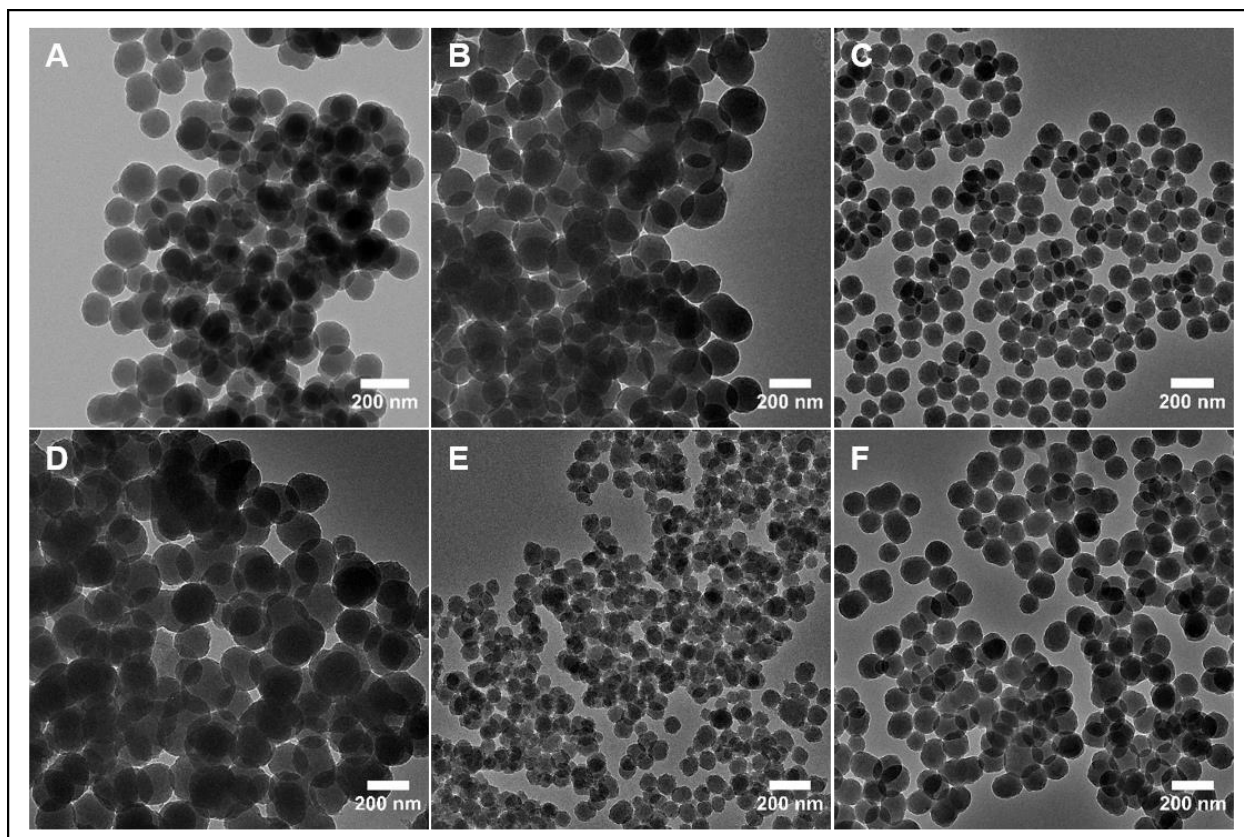

**Figure S1. Representative TEM images show spherical shape and uniform size distribution of synthetic melanin nanoparticles. A) SMNP made by polymerization of L-3,4-dihydroxyphenylalanine. Figures B-F show metal-doped SMNPs. B) Mn-doped SMNP, C) Fe-doped SMNP, D) Ni-doped SMNP, E) Cu-doped SMNP, and F) Zn-doped SMNP.**

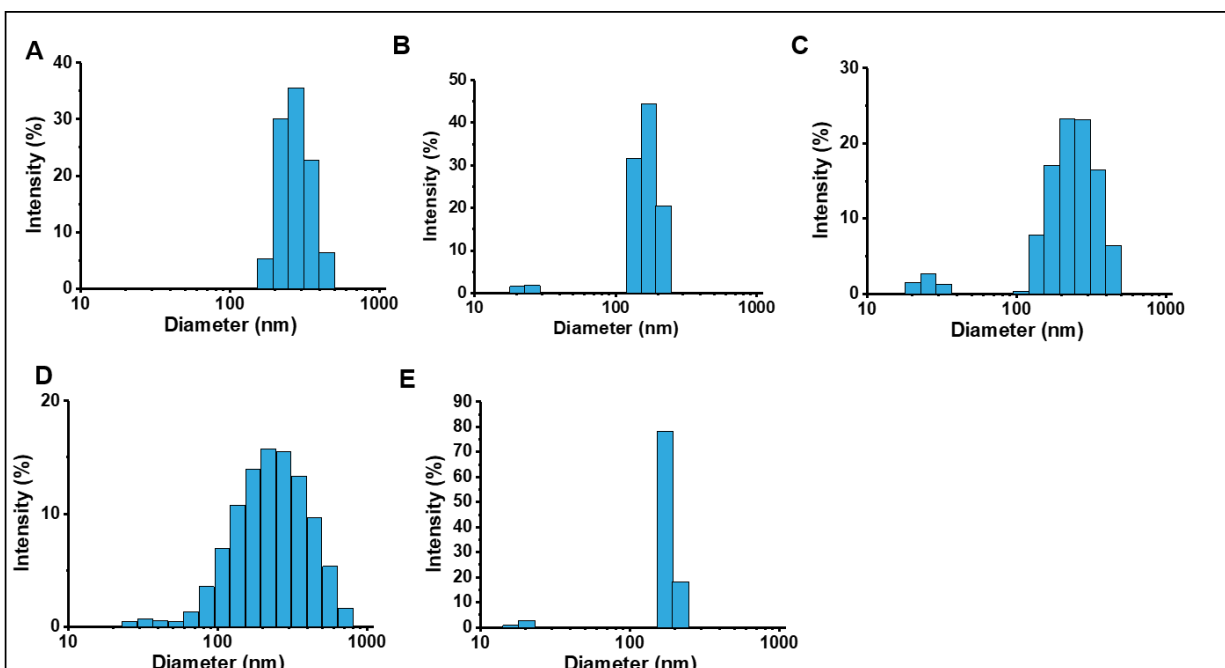

**Figure S2. Representative DLS data show size distribution of synthetic melanin nanoparticles. Figures A-F show metal-doped SMNPs. A) Mn-doped SMNP, B) Fe-doped SMNP, C) Ni-doped SMNP, D) Cu-doped SMNP, and E) Zn-doped SMNP.**

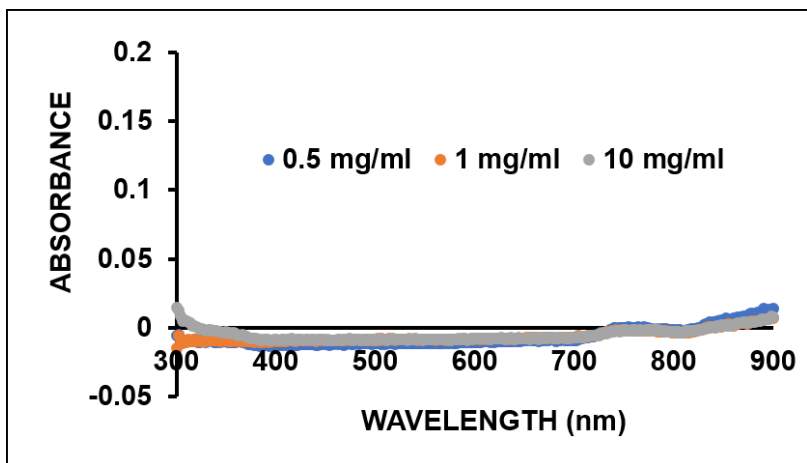

**Supplementary Figure S3. Absorbance of Gd(III) solution.** Gd(III) was dissolved in water at 0.5 mg/ml, 1 mg/ml, and 10 mg/ml and showed low absorbance from 300-900 nm.

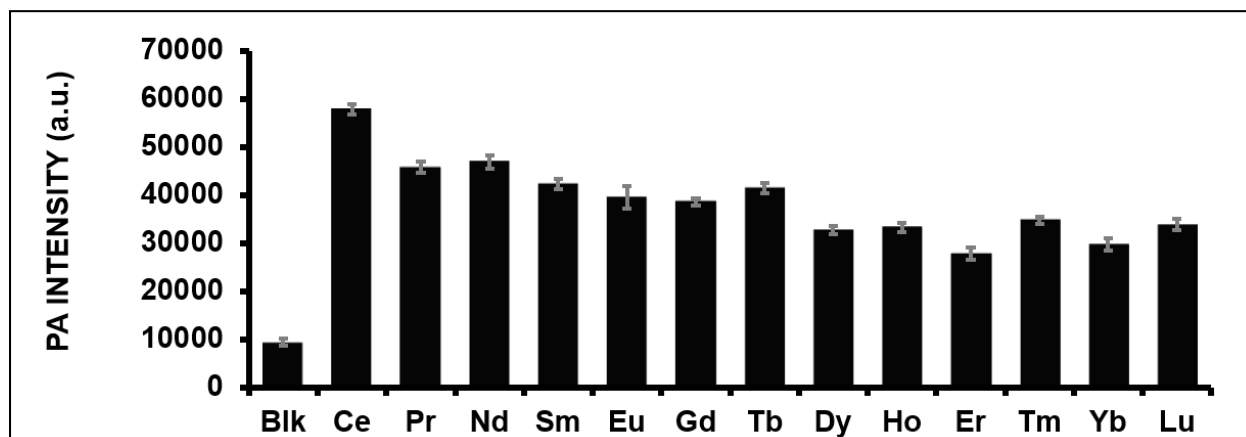

**Supplementary Figure S4. PA intensity data of lanthanide-doped SMNPs.** Ce-doped SMNP had the highest PA signal of 57,766.6 +/- 1,073.5 while Er-doped had the lowest PA signal of 9,375.6 +/- 838.2 of the lanthanide-doped samples. Error bars represent the standard deviation (n=8).

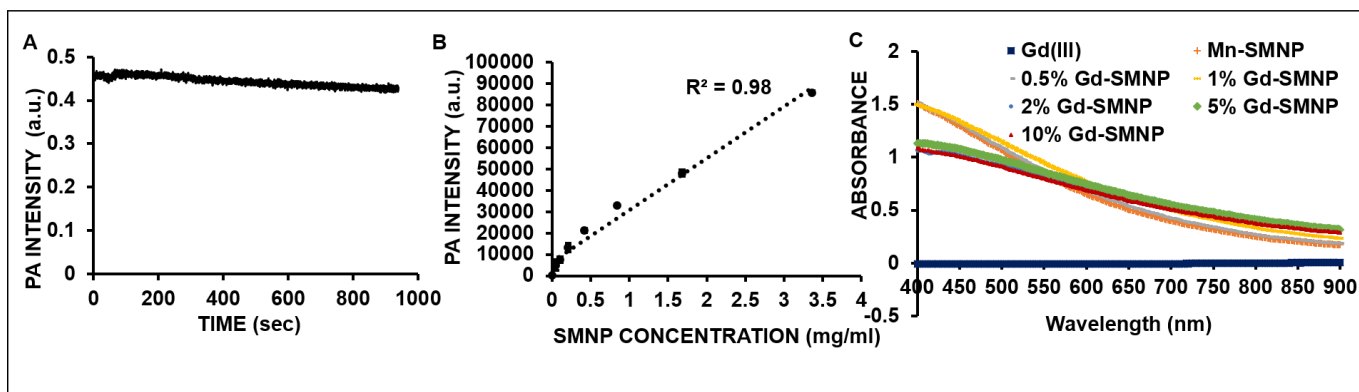

**Supplementary Figure S5.** **A)** The PA signal difference between the first 100 frames and the last 100 frames is 6.6% indicating that the SMNPs are stable under photoacoustic irradiation. **B)** There is a linear relationship of PA signal based on SMNP concentration measured from 0–3.5 mg/mL. **C)** The absorbance of 5% and 10% Gd-SMNP was higher from 600–900 nm than Mn-SMNP and 0.5 – 2% Gd-SMNP.

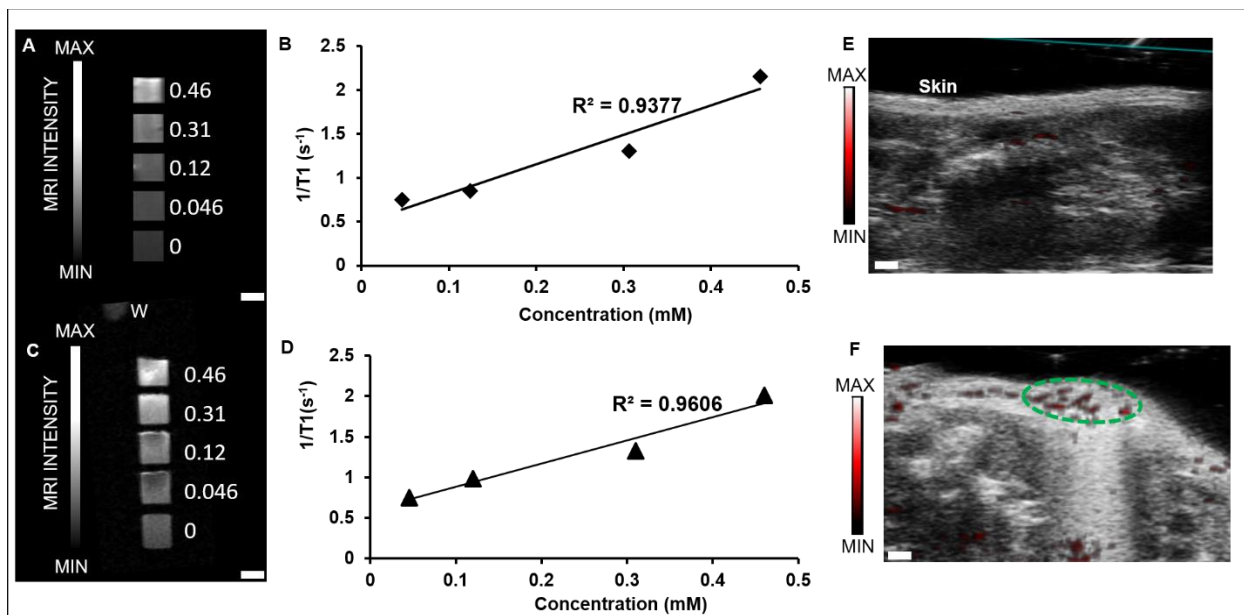

**Supplementary Figure S6. MRI and PA data of Gd(III)-SMNP.** **A)** MRI of Gd(III)-SMNP particles in 4.7 T. **B)**  $1/T1$  ( $s^{-1}$ ) vs Concentration (mM) for 4.7T field. **C)** MRI of Gd(III)-SMNP particles in 7 T. **D)**  $1/T1$  ( $s^{-1}$ ) vs Concentration (mM) for 7 T field. Scale bar = 2 mm. **E)** PA imaging of mouse prior to injection of Gd-SMNP nanoparticles. **F)** PA imaging of mouse after injection of Gd-SMNP shows increased PA signal (area circled in green).

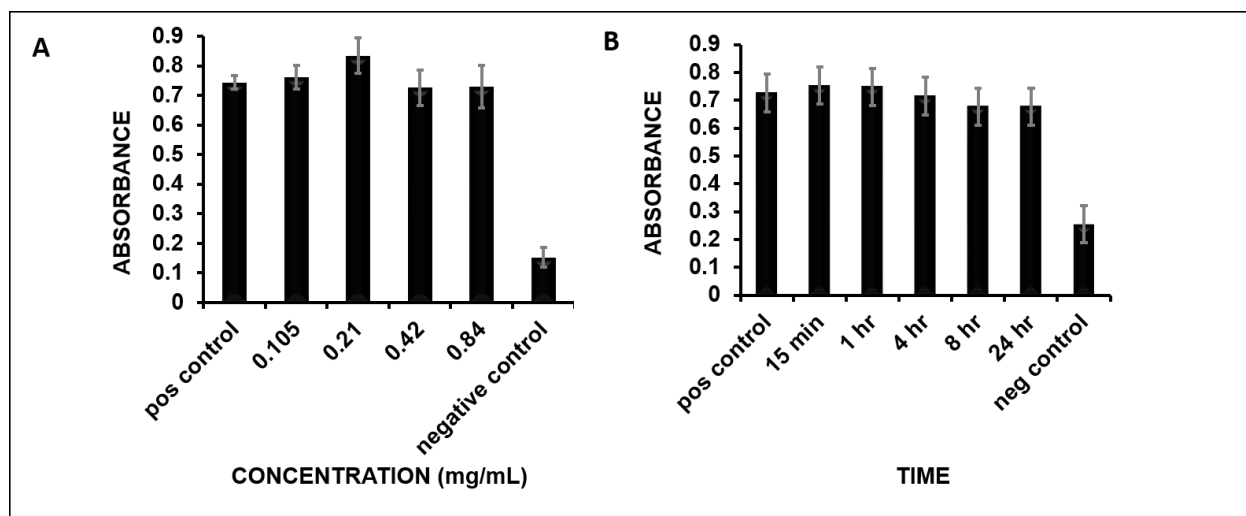

**Supplementary Figure S7. MTT assays of Gd-SMNP labeled hMSCs.** **A)** Cell viability was not affected by increasing the concentration from 0.105 – 0.84 mg/mL of Gd(III)-SMNP. **B)** Cell viability decreased approximately 7% after 24 hours of treatment with Gd(III)-SMNP (0.42 mg/mL). The positive (pos) control was unlabeled cells. The negative (neg) control was cells treated with 70% ethanol. The error bars represent the standard error. N = 6.



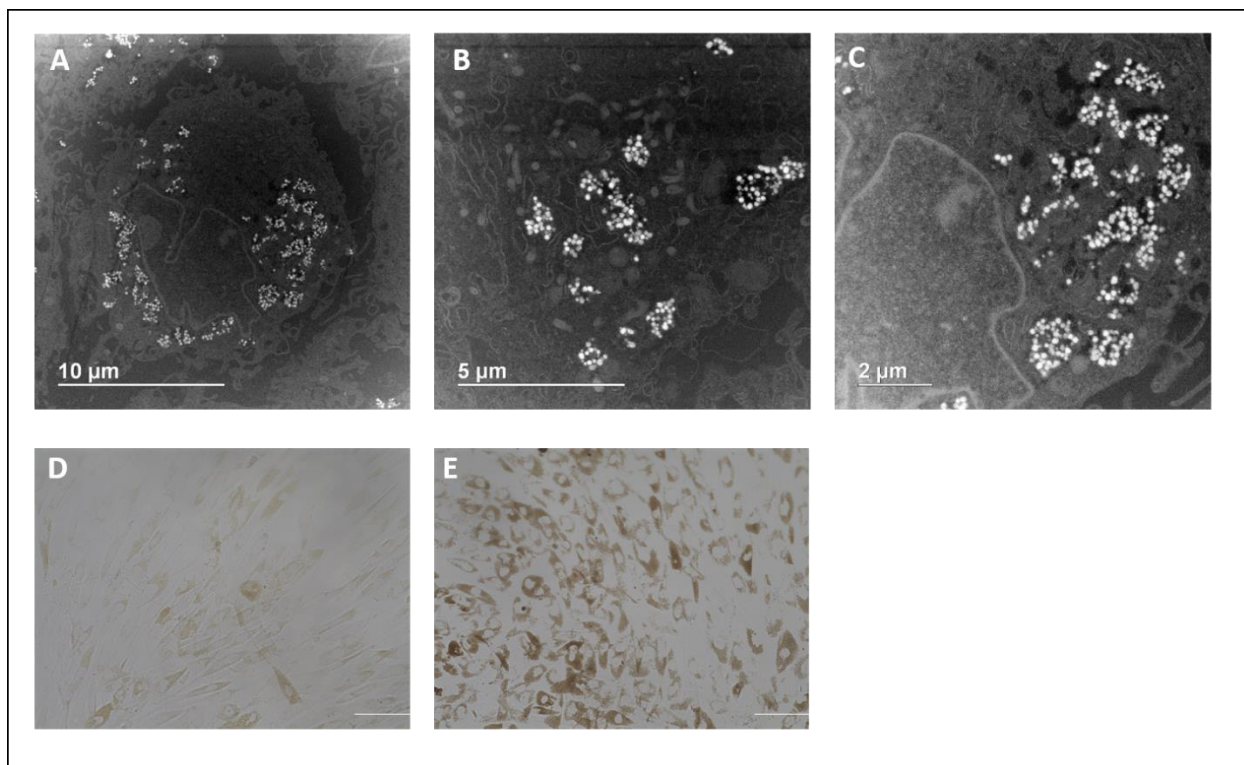

**Supplementary Figure S8. Dark Field STEM microscopy and optical microscopy show internalization of nanoparticles.** **A-C)** Dark field STEM microscopy of hMSCs labeled with Gd-SMNP (4 hrs, 0.42 mg/mL). The Gd-SMNP particles (white spheres) are located in the cytoplasm of cells. **D)** Brightfield microscopy of unlabeled hMSCs. **E)** Brightfield microscopy of hMSCs labeled with Gd-SMNP (4 hrs, 0.42 mg/mL). The cells continued to proliferate for 3 weeks when labeled with Gd-SMNP. Scale bar = 200 μm.

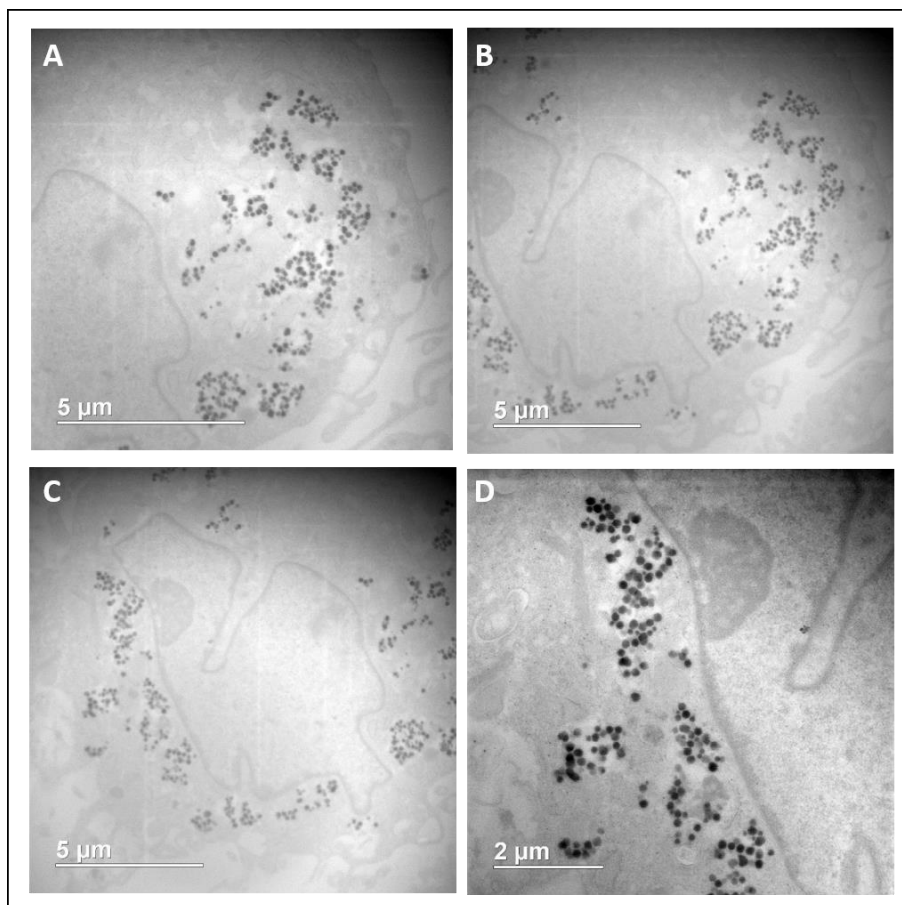

**Supplementary Figure S9. Figures A-D show TEM microscopy of hMSCs treated with Gd(III)-SMNP (4 hrs, 0.42 mg/mL). The Gd(III)-SMNP particles (black spheres) are located in the cytoplasm of cells.**

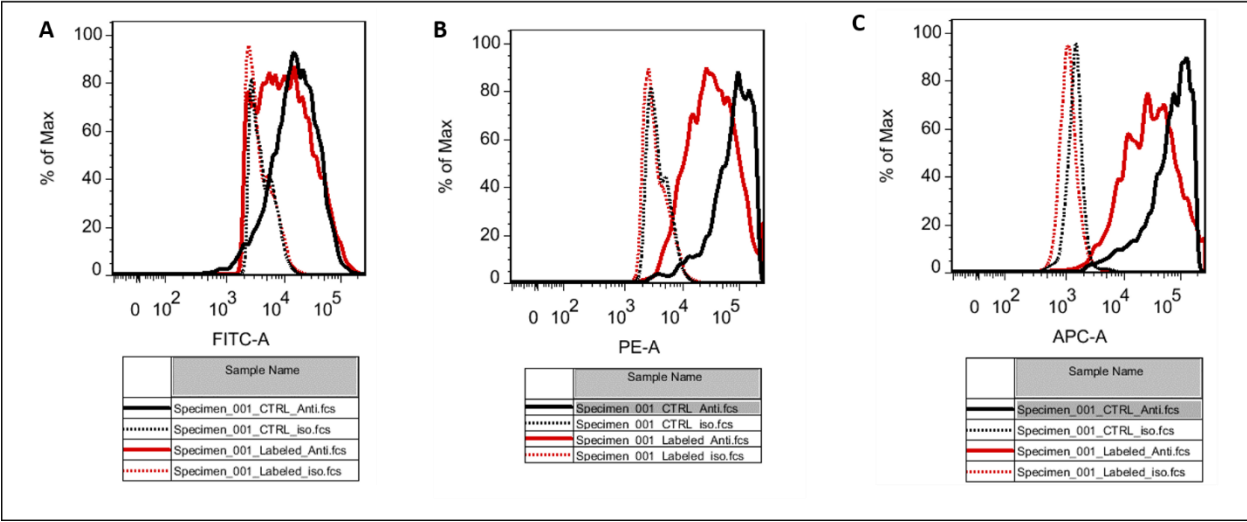

**Supplementary Figure S10. Flow cytometry data of hMSCs labeled with 0.42 mg/mL of-Gd(III)-SMNP. A) CD90-FITC, B) CD73-PE, and C) CD105-APC.**

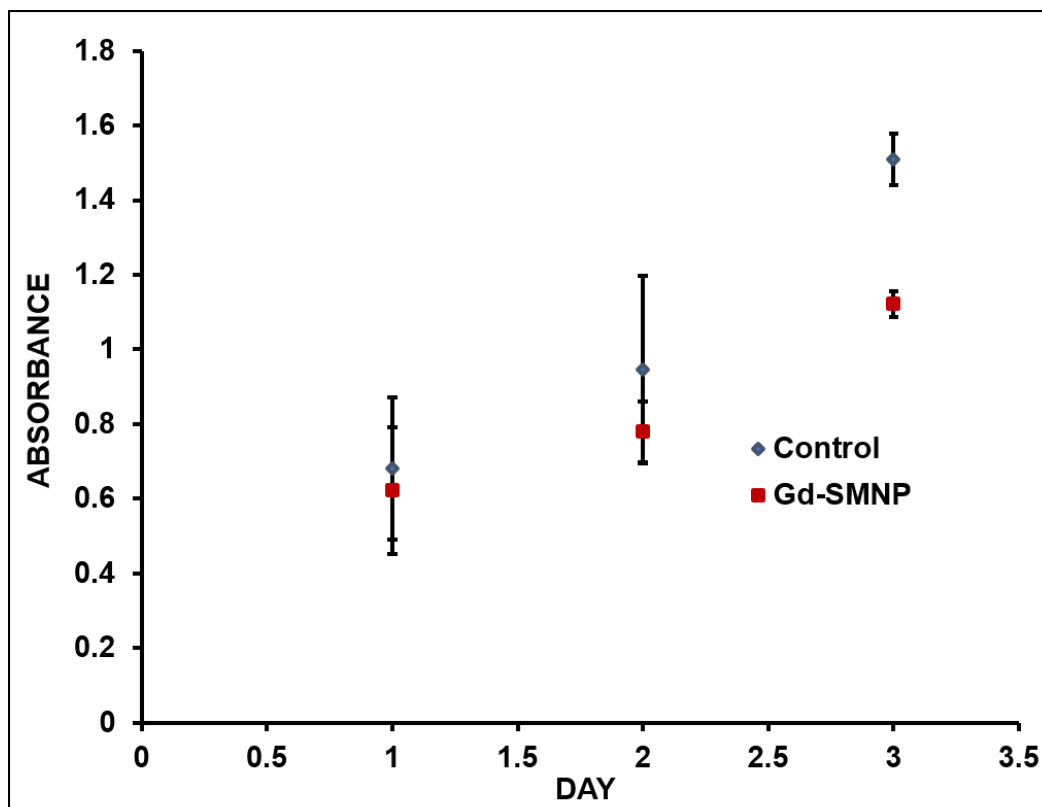

**Supplementary Figure S11. Viability assay of Gd(III)-SMNP treated hMSCs.** Cells doubled in approximately 3 days for control (untreated hMSCs) and cells labeled with 0.42 mg/mL Gd(III)-SMNP. The error bars represent the standard error (n=8).
